# Supplementary material
Source: PubMed Central journal article supplement (PMC8179203)
Supplement: pnas.2004834117.sapp.pdf [file pnas.2004834117.sapp.pdf]

a

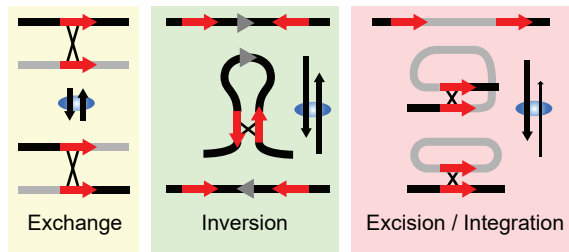

b

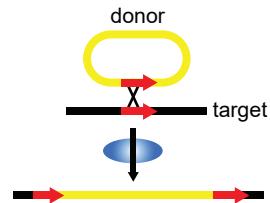

c

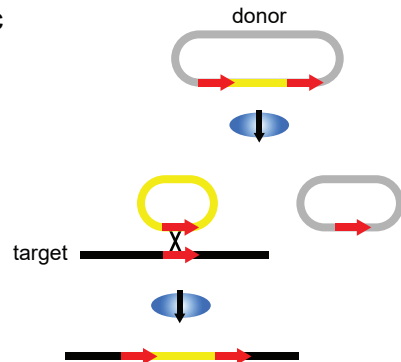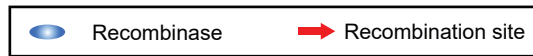

**Supplementary Figure 1. Using a recombinase system for targeted gene insertion. (a)** A recombinase (oval) catalyzes the exchange between two recombination sites (arrows) placed in proximity. The positioning of the recombination sites dictates the outcome of the recombination. This process is reversible. **(b-c)** Targeted insertion of DNA at a designated genomic target may occur via the genetic recombination between recombination sites. The two panels illustrate two examples of insertion strategies. In (b), a single recombination results in the integration of the entire donor DNA at the genomic target. In (c), two subsequent recombination reactions result in the targeted insertion of a defined section of the donor DNA.

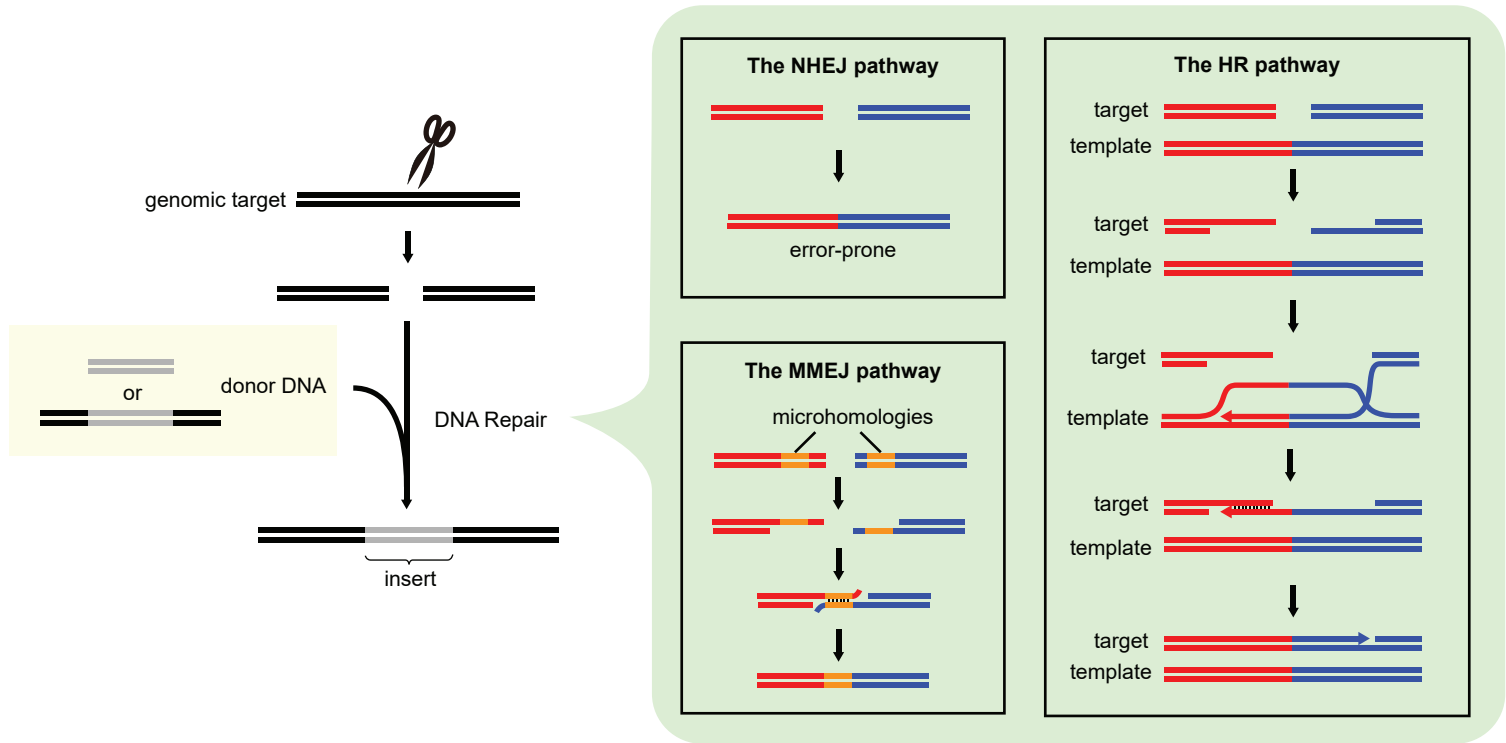

**Supplementary Figure 2. Applying various DNA repair pathways in targeted DNA insertion.** Various DNA repair mechanisms have been employed to insert donor DNA at designated genomic targets. In these methods, a site-directed nuclease creates a double-stranded break at the designated insertion target. The repair of the break in the presence of a properly designed donor DNA can lead to the insertion of a specific DNA sequence. In NHEJ, the broken ends of the DNA are re-joined directly. Repair through NHEJ is error-prone, often accompanied by the insertion or deletion of bases at the junction. In MMEJ, the Watson-Crick base pairing of microhomology sequences present on both DNA ends before end joining results in the deletion of the nucleotide sequence between the two microhomologies. During HR-mediated repair, a homologous repair template is employed to guide the repair of the double-stranded break. The diagram for the HR pathway illustrates synthesis-dependent strand annealing, the prevailing mechanism of HR-mediated repair in somatic plant cells. DSB, double-stranded break; NHEJ, non-homologous end joining; MMEJ, microhomology-mediated end joining; HR, homologous recombination.

**Supplementary Table 1. Examples of targeted DNA insertion in plants**

| Molecular Tool           | Species               | Delivery             | Outcome                            | Reported efficiency* of targeted insertion                                                       | Whole plant obtained? | Reference |
|--------------------------|-----------------------|----------------------|------------------------------------|--------------------------------------------------------------------------------------------------|-----------------------|-----------|
| Homologous Recombination | Tobacco               | Direct gene transfer | Marker restored                    | $0.5 - 4.2 \times 10^{-4}$<br>(targeted insertion / random insertion)                            | Y                     | [1]       |
|                          | Tobacco               | Agrobacterium        | Marker restored                    | $3 \times 10^{-5}$<br>(targeted insertion / random insertion)                                    | Y                     | [2]       |
|                          | Arabidopsis           | Agrobacterium        | Marker restored                    | $10^{-4}$<br>(targeted insertion / random insertion)                                             | Y                     | [3]       |
|                          | Tobacco               | Direct gene transfer | Marker restored                    | up to $10^{-4}$<br>(targeted insertion / random insertion)                                       | Y                     | [4]       |
|                          | Arabidopsis           | Agrobacterium        | Gene disrupted by marker insertion | $7.7 \times 10^{-4}$<br>(targeted insertion / random insertion)                                  | N                     | [5]       |
|                          | Tobacco               | Agrobacterium        | Marker restored                    | $3.2 \times 10^{-6}$<br>(targeted insertion / random insertion)                                  | Y                     | [6]       |
|                          | Lotus japonicus       | Agrobacterium        | Gene disrupted by marker insertion | Below $5.3 \times 10^{-5}$<br>(targeted insertion / random insertion)                            | N                     | [7]       |
|                          | Arabidopsis           | Agrobacterium        | Gene disrupted by marker insertion | $1.3 \times 10^{-3}$<br>(targeted insertion / random insertion)                                  | Y                     | [8]       |
|                          | Tobacco               | Agrobacterium        | Gene disrupted by marker insertion | $5.7 \times 10^{-3}$<br>(targeted insertion / dual-selected events)                              | Y                     | [9]       |
|                          | Physcomytrella patens | Direct gene transfer | Marker inserted                    | 93% of the transformation events                                                                 | Y                     | [10]      |
|                          | Rice                  | Agrobacterium        | Gene disrupted by marker insertion | 1% of the dual-selected events                                                                   | Y                     | [11]      |
|                          | Arabidopsis           | Agrobacterium        | Reporter gene inserted in frame    | 3% to 17%<br>(targeted insertion / random insertion)                                             | Y                     | [12]      |
|                          | Rice                  | Agrobacterium        | Gene disrupted by marker insertion | 2% of the dual-selected events                                                                   | Y                     | [13]      |
|                          | Arabidopsis           | Agrobacterium        | Reporter gene inserted in frame    | $4.17 \times 10^{-5}$<br>(targeted insertion / random insertion)                                 | Y                     | [14]      |
| Recombinase              | Tobacco               | Direct gene transfer | Marker restored                    | Up to $10^{-4}$ (targeted insertion / total treated)<br>Comparable to random insertion frequency | Y                     | [15]      |
|                          | Arabidopsis           | Agrobacterium        | Marker restored                    | About $2 \times 10^{-2}$<br>(targeted events / explants used)                                    | Y                     | [16]      |
|                          | Arabidopsis           | Agrobacterium        | Marker restored                    | About $10^{-3}$<br>(targeted events / explants used)                                             | Y                     | [17]      |
|                          | Rice                  | Bombardment          | Marker restored                    | Not specified                                                                                    | Y                     | [18]      |
|                          | Tobacco               | Bombardment          | BAC inserted                       | Not specified                                                                                    | Y                     | [19]      |
|                          | Tobacco               | Direct gene transfer | Marker restored                    | Not specified                                                                                    | Y                     | [20]      |
|                          | Tobacco               | Agrobacterium        | Marker inserted                    | 1% - 3%                                                                                          | Y                     | [21]      |

|              |                        |                               |                                       |                                                                                               |   |      |
|--------------|------------------------|-------------------------------|---------------------------------------|-----------------------------------------------------------------------------------------------|---|------|
|              |                        |                               |                                       | (targeted events / explants used)                                                             |   |      |
|              | Arabidopsis            | Agrobacterium                 | Marker restored                       | Up to $3.5 \times 10^{-3}$<br>(targeted events / explants used)                               | Y | [22] |
|              | Soybean                | Bombardment                   | Marker restored                       | Not specified                                                                                 | Y | [23] |
|              | Rice                   | Bombardment                   | Marker restored                       | 0.2 - 0.3 targeted events per plate<br>bombarded                                              | Y | [24] |
|              | Maize                  | Agrobacterium                 | Marker restored                       | 6.7% - 6.9%<br>(targeted events / explants used)                                              | Y | [25] |
|              | Maize                  | Agrobacterium/<br>Bombardment | Trait genes<br>inserted               | 4% for bombardment<br>5.9% - 9.3% for Agrobacterium<br>(targeted events / explants used)      | Y | [26] |
| Meganuclease | Tobacco                | Agrobacterium                 | Marker restored                       | Up to $1.88 \times 10^{-3}$<br>(targeted insertion / random insertion)                        | Y | [27] |
|              | Tobacco                | Agrobacterium                 | Marker restored                       | 2.58% of the herbicide-tolerant events                                                        | Y | [28] |
|              | Tobacco                | Agrobacterium                 | Marker restored                       | 1% - 2%<br>(targeted insertion / explants used)                                               | Y | [29] |
|              | Maize                  | Agrobacterium/<br>Bombardment | Marker restored                       | Up to 0.3<br>(targeted insertion / random insertion)                                          | Y | [30] |
|              | Maize                  | Agrobacterium +<br>Cross      | Marker restored                       | 0.085%<br>(targeted insertion / embryos screened)                                             | Y | [31] |
|              | Cotton                 | Bombardment                   | Marker inserted                       | 1.8% of the herbicide-tolerant events                                                         | Y | [32] |
|              | Barley                 | Agrobacterium                 | Marker restored                       | About 1%<br>(targeted insertion / explants used)                                              | Y | [33] |
| ZFN          | Tobacco                | Direct gene<br>transfer       | Marker restored                       | About 0.17<br>(targeted insertion / random insertion)                                         | Y | [34] |
|              | Maize                  | Silicon carbide<br>whiskers   | Gene disrupted by<br>marker insertion | 18.7% - 40% of the herbicide-tolerant events                                                  | Y | [35] |
|              | Tobacco                | Agrobacterium                 | Gene disrupted by<br>marker insertion | Up to 10% of the herbicide-tolerant events                                                    | Y | [36] |
|              | Arabidopsis            | Agrobacterium                 | Marker inserted                       | 0.1% of the herbicide-tolerant events                                                         | Y | [37] |
|              | Maize                  | Bombardment                   | Marker inserted                       | Up to 5% of the herbicide-tolerant events                                                     | Y | [38] |
|              | Arabidopsis<br>Tobacco | Agrobacterium                 | Marker inserted                       | 4.8% of herbicide-tolerant Arabidopsis<br>events<br>6.7% of herbicide-tolerant tobacco events | Y | [39] |
|              | Arabidopsis            | Direct gene<br>transfer       | DNA fragment<br>inserted              | Up to 5.32% of all cells used<br>based on the sequencing reads                                | N | [40] |
|              | Tobacco                | Agrobacterium<br>+ Replicon   | Marker restored                       | Not specified                                                                                 | Y | [41] |
|              | Maize                  | Bombardment                   | Marker inserted                       | Up to 30% of the herbicide-tolerant events                                                    | Y | [42] |
|              | Potato                 | Agrobacterium<br>+ Replicon   | Marker restored                       | Not specified                                                                                 | N | [43] |

|            |                      |                                |                                    |                                                                                                  |   |      |
|------------|----------------------|--------------------------------|------------------------------------|--------------------------------------------------------------------------------------------------|---|------|
|            | Soybean              | Bombardment                    | DNA fragment inserted              | 2.8% of the herbicide-tolerant events (7.1kb)<br>0.23% of the herbicide-tolerant events (16.2kb) | Y | [44] |
| TALEN      | Tobacco              | Direct gene transfer           | Reporter gene inserted in frame    | Up to 14% of all cells used                                                                      | N | [45] |
|            | Tomato               | Agrobacterium + Replicon       | Gene activated and marker inserted | 7.28% of the herbicide-tolerant events                                                           | Y | [46] |
|            | Potato               | Agrobacterium + Replicon       | Gene modified and marker inserted  | Up to 41.7% of the herbicide-tolerant events                                                     | Y | [43] |
|            | Potato               | Agrobacterium                  | Marker restored                    | Up to 96% of the herbicide-tolerant events                                                       | Y | [47] |
| CRISPR-Cas | Rice                 | Direct gene transfer           | DNA fragment inserted              | Not specified                                                                                    | N | [48] |
|            | Arabidopsis          | Agrobacterium                  | Marker inserted                    | 0.14% of the seeds screened                                                                      | Y | [49] |
|            | Tomato               | Agrobacterium + Replicon       | Gene activated and marker inserted | 2.75% - 8.8% (targeted events / explants used)                                                   | Y | [46] |
|            | Maize                | Bombardment                    | Marker inserted                    | 2.5% - 4.1% of the herbicide-tolerant events                                                     | Y | [50] |
|            | Soybean              | Bombardment                    | Marker inserted                    | 3.8% - 4.6% of the herbicide-tolerant events                                                     | Y | [51] |
|            | Rice                 | Bombardment                    | DNA fragment inserted              | 2.2% of the CRISPR-Cas-expressing events                                                         | Y | [52] |
|            | Arabidopsis          | Agrobacterium                  | Reporter gene inserted             | 0.2% of the CRISPR-Cas-expressing events                                                         | Y | [53] |
|            | Potato               | Agrobacterium + Replicon       | Gene modified and marker inserted  | Up to 12.5% of the herbicide-tolerant events                                                     | Y | [43] |
|            | Tobacco              | Agrobacterium + Replicon       | Marker restored                    | Not specified                                                                                    | N | [54] |
|            | Wheat                | Bombardment + Replicon         | Reporter gene inserted in frame    | Not specified                                                                                    |   |      |
|            | Wheat                | Bombardment + Replicon         | Reporter gene inserted             | 5.74% of the transformed cells                                                                   | N | [55] |
|            | Rice                 | Ribonucleoprotein transfection | Epitope tag inserted in frame      | 2.13% - 4.69% of the target DNA                                                                  | N | [56] |
|            | Rice                 | Agrobacterium + Replicon       | Reporter gene inserted in frame    | 4.7% - 8.5% of the herbicide-tolerant events                                                     | Y | [57] |
|            | Maize                | Bombardment                    | DNA fragment inserted              | 1% of the CRISPR-Cas-expressing events                                                           | Y | [58] |
|            | Physcomyrella patens | Direct gene transfer           | Gene disrupted by marker insertion | Up to 100% of the herbicide-tolerant events                                                      | Y | [59] |
|            | Rice                 | Bombardment                    | Gene disrupted by marker insertion | 8% of the herbicide-tolerant events                                                              | Y | [60] |
|            | Tomato               | Agrobacterium + Replicon       | Gene repaired                      | 25 % of the CRISPR-Cas-expressing events                                                         | Y | [61] |
|            | Arabidopsis          | Agrobacterium                  | Gene repaired                      | 0.12% of the examined plants                                                                     | Y | [62] |

|  |             |                          |                                    |                                                       |   |      |
|--|-------------|--------------------------|------------------------------------|-------------------------------------------------------|---|------|
|  | Arabidopsis | Agrobacterium            | Reporter gene inserted in frame    | 6.3% - 9.1% of the examined plants                    | Y | [63] |
|  | Tomato      | Agrobacterium            | Gene repaired and marker inserted  | 1.29% of the herbicide-tolerant events                | Y | [64] |
|  | Rice        | Agrobacterium            | Marker inserted                    | 3.8% - 5.3% of the herbicide-tolerant events          | Y | [65] |
|  | Rice        | Bombardment              | Epitope tag inserted in frame      | Not specified                                         | N | [66] |
|  | Tomato      | Agrobacterium + Replicon | Gene activated and marker inserted | Up to 12.8% of the herbicide-tolerant events          | Y | [67] |
|  | Rice        | Bombardment              | DNA fragment inserted              | 6.25% of the CRISPR-Cas-expressing events             | Y | [68] |
|  | Maize       | Bombardment              | Landing pad with marker inserted   | Up to 18% of the herbicide-tolerant events            | Y | [26] |
|  | Rice        | Bombardment              | DNA fragment inserted              | An average of 25% of the CRISPR-Cas-expressing events | Y | [69] |
|  | Maize       | Agrobacterium            | DNA fragment inserted              | Up to 4.7% of the herbicide-tolerant events           | Y | [70] |

\*Not all efficiencies are comparable due to the difference among calculation methods.

### Supplementary Table References:

1. Paszkowski, J., et al., *Gene targeting in plants*. EMBO J, 1988. **7**(13): p. 4021-6.
2. Offringa, R., et al., *Extrachromosomal homologous recombination and gene targeting in plant cells after Agrobacterium mediated transformation*. EMBO J, 1990. **9**(10): p. 3077-84.
3. Halfter, U., P.C. Morris, and L. Willmitzer, *Gene targeting in Arabidopsis thaliana*. Mol Gen Genet, 1992. **231**(2): p. 186-93.
4. Hrouda, M. and J. Paszkowski, *High fidelity extrachromosomal recombination and gene targeting in plants*. Mol Gen Genet, 1994. **243**(1): p. 106-11.
5. Miao, Z.H. and E. Lam, *Targeted disruption of the TGA3 locus in Arabidopsis thaliana*. Plant J, 1995. **7**(2): p. 359-65.
6. Risseeuw, E., et al., *Targeted recombination in plants using Agrobacterium coincides with additional rearrangements at the target locus*. Plant J, 1995. **7**(1): p. 109-19.
7. Thykjaer, T., et al., *Gene targeting approaches using positive-negative selection and large flanking regions*. Plant Mol Biol, 1997. **35**(4): p. 523-30.
8. Kempin, S.A., et al., *Targeted disruption in Arabidopsis*. Nature, 1997. **389**(6653): p. 802-3.
9. Risseeuw, E., M.E. Franke-van Dijk, and P.J. Hooykaas, *Gene targeting and instability of Agrobacterium T-DNA loci in the plant genome*. Plant J, 1997. **11**(4): p. 717-28.
10. Schaefer, D.G. and J.P. Zryd, *Efficient gene targeting in the moss Physcomitrella patens*. Plant J, 1997. **11**(6): p. 1195-206.
11. Terada, R., et al., *Efficient gene targeting by homologous recombination in rice*. Nat Biotechnol, 2002. **20**(10): p. 1030-4.
12. Shaked, H., C. Melamed-Bessudo, and A.A. Levy, *High-frequency gene targeting in Arabidopsis plants expressing the yeast RAD54 gene*. Proceedings of the National Academy of Sciences of the United States of America, 2005. **102**(34): p. 12265-12269.

13. Terada, R., et al., *Gene targeting by homologous recombination as a biotechnological tool for rice functional genomics*. Plant Physiol, 2007. **144**(2): p. 846-56.
14. Even-Faitelson, L., et al., *Localized egg-cell expression of effector proteins for targeted modification of the Arabidopsis genome*. Plant J, 2011. **68**(5): p. 929-37.
15. Albert, H., et al., *Site-Specific Integration of DNA into Wild-Type and Mutant Lox Sites Placed in the Plant Genome*. Plant Journal, 1995. **7**(4): p. 649-659.
16. Vergunst, A.C., L.E.T. Jansen, and P.J.J. Hooykaas, *Site-specific integration of Agrobacterium T-DNA in Arabidopsis thaliana mediated by Cre recombinase*. Nucleic Acids Research, 1998. **26**(11): p. 2729-2734.
17. Vergunst, A.C. and P.J. Hooykaas, *Cre/lox-mediated site-specific integration of Agrobacterium T-DNA in Arabidopsis thaliana by transient expression of cre*. Plant Mol Biol, 1998. **38**(3): p. 393-406.
18. Srivastava, V. and D.W. Ow, *Biostic mediated site-specific integration in rice*. Molecular Breeding, 2002. **8**(4): p. 345-350.
19. Choi, S., et al., *A new approach for the identification and cloning of genes: the pBACwch system using Cre/lox site-specific recombination*. Nucleic Acids Res, 2000. **28**(7): p. E19.
20. Day, C.D., et al., *Transgene integration into the same chromosome location can produce alleles that express at a predictable level, or alleles that are differentially silenced*. Genes & Development, 2000. **14**(22): p. 2869-2880.
21. Nanto, K., K. Yamada-Watanabe, and H. Ebinuma, *Agrobacterium-mediated RMCE approach for gene replacement*. Plant Biotechnology Journal, 2005. **3**(2): p. 203-214.
22. Louwse, J.D., et al., *Stable recombinase-mediated cassette exchange in Arabidopsis using Agrobacterium tumefaciens*. Plant Physiology, 2007. **145**(4): p. 1282-1293.
23. Li, Z.S., et al., *Site-Specific Integration of Transgenes in Soybean via Recombinase-Mediated DNA Cassette Exchange*. Plant Physiology, 2009. **151**(3): p. 1087-1095.
24. Nandy, S. and V. Srivastava, *Site-specific gene integration in rice genome mediated by the FLP-FRT recombination system*. Plant Biotechnol J, 2011. **9**(6): p. 713-21.
25. Anand, A., et al., *High efficiency Agrobacterium-mediated site-specific gene integration in maize utilizing the FLP-FRT recombination system*. Plant Biotechnol J, 2019. **17**(8): p. 1636-1645.
26. Gao, H., et al., *Complex Trait Loci in Maize Enabled by CRISPR-Cas9 Mediated Gene Insertion*. Front Plant Sci, 2020. **11**: p. 535.
27. Puchta, H., B. Dujon, and B. Hohn, *Two different but related mechanisms are used in plants for the repair of genomic double-strand breaks by homologous recombination*. Proc Natl Acad Sci U S A, 1996. **93**(10): p. 5055-60.
28. Tzfira, T., et al., *Site-specific integration of Agrobacterium tumefaciens T-DNA via double-stranded intermediates*. Plant Physiol, 2003. **133**(3): p. 1011-23.
29. Chilton, M.D. and Q. Que, *Targeted integration of T-DNA into the tobacco genome at double-stranded breaks: new insights on the mechanism of T-DNA integration*. Plant Physiol, 2003. **133**(3): p. 956-65.
30. D'Halluin, K., et al., *Homologous recombination: a basis for targeted genome optimization in crop species such as maize*. Plant Biotechnol J, 2008. **6**(1): p. 93-102.
31. Ayar, A., et al., *Gene targeting in maize by somatic ectopic recombination*. Plant Biotechnol J, 2013. **11**(3): p. 305-14.
32. D'Halluin, K., et al., *Targeted molecular trait stacking in cotton through targeted double-strand break induction*. Plant Biotechnology Journal, 2013. **11**(8): p. 933-941.
33. Watanabe, K., et al., *Stable gene replacement in barley by targeted double-strand break induction*. J Exp Bot, 2016. **67**(5): p. 1433-45.

34. Wright, D.A., et al., *High-frequency homologous recombination in plants mediated by zinc-finger nucleases*. Plant J, 2005. **44**(4): p. 693-705.
35. Shukla, V.K., et al., *Precise genome modification in the crop species Zea mays using zinc-finger nucleases*. Nature, 2009. **459**(7245): p. 437-41.
36. Cai, C.Q., et al., *Targeted transgene integration in plant cells using designed zinc finger nucleases*. Plant Mol Biol, 2009. **69**(6): p. 699-709.
37. de Pater, S., et al., *ZFN-induced mutagenesis and gene-targeting in Arabidopsis through Agrobacterium-mediated floral dip transformation*. Plant Biotechnol J, 2009. **7**(8): p. 821-35.
38. Ainley, W.M., et al., *Trait stacking via targeted genome editing*. Plant Biotechnol J, 2013. **11**(9): p. 1126-34.
39. Weinthal, D.M., R.A. Taylor, and T. Tzfira, *Nonhomologous end joining-mediated gene replacement in plant cells*. Plant Physiol, 2013. **162**(1): p. 390-400.
40. Qi, Y., et al., *Increasing frequencies of site-specific mutagenesis and gene targeting in Arabidopsis by manipulating DNA repair pathways*. Genome Res, 2013. **23**(3): p. 547-54.
41. Baltes, N.J., et al., *DNA replicons for plant genome engineering*. Plant Cell, 2014. **26**(1): p. 151-63.
42. Kumar, S., et al., *A modular gene targeting system for sequential transgene stacking in plants*. J Biotechnol, 2015. **207**: p. 12-20.
43. Butler, N.M., et al., *Geminivirus-Mediated Genome Editing in Potato (Solanum tuberosum L.) Using Sequence-Specific Nucleases*. Front Plant Sci, 2016. **7**: p. 1045.
44. Bonawitz, N.D., et al., *Zinc finger nuclease-mediated targeting of multiple transgenes to an endogenous soybean genomic locus via non-homologous end joining*. Plant Biotechnol J, 2019. **17**(4): p. 750-761.
45. Zhang, Y., et al., *Transcription activator-like effector nucleases enable efficient plant genome engineering*. Plant Physiol, 2013. **161**(1): p. 20-7.
46. Cermak, T., et al., *High-frequency, precise modification of the tomato genome*. Genome Biol, 2015. **16**: p. 232.
47. Forsyth, A., et al., *Transcription Activator-Like Effector Nucleases (TALEN)-Mediated Targeted DNA Insertion in Potato Plants*. Front Plant Sci, 2016. **7**: p. 1572.
48. Shan, Q., et al., *Targeted genome modification of crop plants using a CRISPR-Cas system*. Nat Biotechnol, 2013. **31**(8): p. 686-8.
49. Schiml, S., F. Fauser, and H. Puchta, *The CRISPR/Cas system can be used as nuclease for in planta gene targeting and as paired nickases for directed mutagenesis in Arabidopsis resulting in heritable progeny*. Plant J, 2014. **80**(6): p. 1139-50.
50. Svitashv, S., et al., *Targeted Mutagenesis, Precise Gene Editing, and Site-Specific Gene Insertion in Maize Using Cas9 and Guide RNA*. Plant Physiol, 2015. **169**(2): p. 931-45.
51. Li, Z., et al., *Cas9-Guide RNA Directed Genome Editing in Soybean*. Plant Physiol, 2015. **169**(2): p. 960-70.
52. Li, J., et al., *Gene replacements and insertions in rice by intron targeting using CRISPR-Cas9*. Nat Plants, 2016. **2**: p. 16139.
53. Zhao, Y., et al., *An alternative strategy for targeted gene replacement in plants using a dual-sgRNA/Cas9 design*. Sci Rep, 2016. **6**: p. 23890.
54. Cermak, T., et al., *A Multipurpose Toolkit to Enable Advanced Genome Engineering in Plants*. Plant Cell, 2017. **29**(6): p. 1196-1217.
55. Gil-Humanes, J., et al., *High-efficiency gene targeting in hexaploid wheat using DNA replicons and CRISPR/Cas9*. Plant J, 2017. **89**(6): p. 1251-1262.
56. Butt, H., et al., *Efficient CRISPR/Cas9-Mediated Genome Editing Using a Chimeric Single-Guide RNA Molecule*. Frontiers in Plant Science, 2017. **8**.
57. Wang, M., et al., *Gene Targeting by Homology-Directed Repair in Rice Using a Geminivirus-Based CRISPR/Cas9 System*. Mol Plant, 2017. **10**(7): p. 1007-1010.



58. Shi, J., et al., *ARGOS8 variants generated by CRISPR-Cas9 improve maize grain yield under field drought stress conditions*. Plant Biotechnol J, 2017. **15**(2): p. 207-216.
59. Collonnier, C., et al., *CRISPR-Cas9-mediated efficient directed mutagenesis and RAD51-dependent and RAD51-independent gene targeting in the moss Physcomitrella patens*. Plant Biotechnol J, 2017. **15**(1): p. 122-131.
60. Begemann, M.B., et al., *Precise insertion and guided editing of higher plant genomes using Cpf1 CRISPR nucleases*. Sci Rep, 2017. **7**(1): p. 11606.
61. Dahan-Meir, T., et al., *Efficient in planta gene targeting in tomato using geminiviral replicons and the CRISPR/Cas9 system*. Plant J, 2018.
62. Hahn, F., et al., *Homology-Directed Repair of a Defective Glabrous Gene in Arabidopsis With Cas9-Based Gene Targeting*. Front Plant Sci, 2018. **9**: p. 424.
63. Miki, D., et al., *CRISPR/Cas9-mediated gene targeting in Arabidopsis using sequential transformation*. Nat Commun, 2018. **9**(1): p. 1967.
64. Danilo, B., et al., *The DFR locus: A smart landing pad for targeted transgene insertion in tomato*. PLoS One, 2018. **13**(12): p. e0208395.
65. Lee, K., et al., *CRISPR/Cas9-mediated targeted T-DNA integration in rice*. Plant Mol Biol, 2019. **99**(4-5): p. 317-328.
66. Ali, Z., et al., *Fusion of the Cas9 endonuclease and the VirD2 relaxase facilitates homology-directed repair for precise genome engineering in rice*. Communications Biology, 2020. **3**(1).
67. Vu, T.V., et al., *Highly efficient homology-directed repair using CRISPR/Cpf1-geminiviral replicon in tomato*. Plant Biotechnol J, 2020. doi.org/10.1111/pbi.13373
68. Dong, O.X., et al., *Marker-free carotenoid-enriched rice generated through targeted gene insertion using CRISPR-Cas9*. Nat Commun, 2020. **11**(1): p. 1178.
69. Lu, Y., et al., *Targeted, efficient sequence insertion and replacement in rice*. Nat Biotechnol, 2020. doi.org/10.1038/s41587-020-0581-5
70. Barone, P., et al., *Efficient Gene Targeting in Maize Using Inducible CRISPR-Cas9 and Marker-free Donor Template*. Mol Plant, 2020. doi.org/10.1016/j.molp.2020.06.008
